# Supplementary material for: Does Each Menstrual Cycle Elicit a Distinct Effect on Olfactory and Gustatory Perception?
Source: MDPI journal article supplement (doi:10.3390/nu13082509), 2021-07-22
Supplement: s1 [file s1]

**Supplementary Table 1.** Hunger and thirst rating, and emotional state rating (stress, anxiety, happiness) in six groups of participants

|                                            | Men (M)<br>N=17 | Postmenopausal women<br>(pmW) N=14 | Women taking oral contraceptives<br>(ocW) N=10 | Women with anovulatory cycle<br>(aoW) N=8 | Women across 1 menstrual cycle<br>(1mcW) N=21 | Women across 2 menstrual cycles<br>(2mcW)* N=29 | Overall P value (between groups comparison) | Post-hoc P value (between groups comparison)                    |
|--------------------------------------------|-----------------|------------------------------------|------------------------------------------------|-------------------------------------------|-----------------------------------------------|-------------------------------------------------|---------------------------------------------|-----------------------------------------------------------------|
| <b>Hunger rating; median (IQR)</b>         |                 |                                    |                                                |                                           |                                               |                                                 |                                             |                                                                 |
| 1 <sup>st</sup> measurement/mid-follicular | 3.50 (4.25)     | 5.00 (2.75)                        | 5.00 (1.75)                                    | 4.00 (6.00)                               | 7.00 (4.25)                                   | 4.00 (4.50)                                     | 0.120                                       | Na                                                              |
| 2 <sup>nd</sup> measurement/ovulation      | 4.50 (3.75)     | 3.00 (4.50)                        | 3.00 (4.00)                                    | 3.00 (3.00)                               | 5.00 (5.00)                                   | 5.00 (4.00)                                     | 0.379                                       | Na                                                              |
| 3 <sup>rd</sup> measurement/mid-luteal     | 4.50 (3.00)     | 5.00 (5.00)                        | 5.00 (5.00)                                    | 6.00 (2.75)                               | 6.00 (5.00)                                   | 5.00 (5.00)                                     | 0.425                                       | Na                                                              |
| 4 <sup>th</sup> measurement/late luteal    |                 |                                    |                                                |                                           | 7.00 (2.50)                                   | 4.00 (3.00)                                     | 0.059                                       | Na                                                              |
| <b>Overall P value</b>                     | 0.459           | 0.607                              | 0.651                                          | 0.385                                     | 0.202                                         | 0.680                                           |                                             |                                                                 |
| <b>Thirst rating; median (IQR)</b>         |                 |                                    |                                                |                                           |                                               |                                                 |                                             |                                                                 |
| 1 <sup>st</sup> measurement/mid-follicular | 4.00 (3.00)     | 3.50 (2.75)                        | 5.00 (2.00)                                    | 4.00 (7.00)                               | 4.00 (4.00)                                   | 6.00 (3.00)                                     | 0.063                                       | Na                                                              |
| 2 <sup>nd</sup> measurement/ovulation      | 4.00 (3.00)     | 4.00 (7.75)                        | 5.00 (4.00)                                    | 4.50 (4.75)                               | 6.00 (4.00)                                   | 6.00 (4.00)                                     | 0.177                                       | Na                                                              |
| 3 <sup>rd</sup> measurement/mid-luteal     | 6.00 (2.00)     | 4.50 (5.25)                        | 7.00 (3.00)                                    | 5.00 (2.00)                               | 6.00 (4.00)                                   | 5.00 (3.00)                                     | 0.128                                       | Na                                                              |
| 4 <sup>th</sup> measurement/late luteal    |                 |                                    |                                                |                                           | 6.00 (2.75)                                   | 5.50 (5.00)                                     | 0.716                                       | Na                                                              |
| <b>Overall P value</b>                     | 0.057           | 0.326                              | 0.102                                          | 0.861                                     | 0.309                                         | 0.037                                           |                                             |                                                                 |
| <b>Post-hoc P value</b>                    | Na              | Na                                 | Na                                             | Na                                        | Na                                            | 0.029 <sup>13</sup> , 0.030 <sup>23</sup>       |                                             |                                                                 |
| <b>Stress; median (IQR)</b>                |                 |                                    |                                                |                                           |                                               |                                                 |                                             |                                                                 |
| 1 <sup>st</sup> measurement/mid-follicular | 2.00 (2.00)     | 3.00 (3.00)                        | 2.00 (3.00)                                    | 2.00 (2.00)                               | 2.00 (3.00)                                   | 2.00 (4.00)                                     | 0.324                                       | Na                                                              |
| 2 <sup>nd</sup> measurement/ovulation      | 2.00 (2.00)     | 3.50 (2.00)                        | 3.50 (6.00)                                    | 1.50 (2.00)                               | 3.50 (4.00)                                   | 3.00 (3.00)                                     | 0.036                                       | 0.004 <sup>12</sup> , 0.002 <sup>24</sup> , 0.039 <sup>34</sup> |
| 3 <sup>rd</sup> measurement/mid-luteal     | 2.00 (2.00)     | 4.00 (2.00)                        | 3.00 (6.00)                                    | 2.50 (2.00)                               | 2.00 (3.00)                                   | 3.00 (5.00)                                     | 0.072                                       | Na                                                              |
| 4 <sup>th</sup> measurement/late luteal    |                 |                                    |                                                |                                           | 3.00 (4.00)                                   | 3.00 (4.00)                                     | 0.754                                       | Na                                                              |
| <b>Overall P value</b>                     | 0.199           | 0.401                              | 0.177                                          | 0.350                                     | 0.419                                         | 0.409                                           |                                             |                                                                 |
| <b>Anxiety; median (IQR)</b>               |                 |                                    |                                                |                                           |                                               |                                                 |                                             |                                                                 |
| 1 <sup>st</sup> measurement/mid-follicular | 2.00 (2.00)     | 3.00 (1.00)                        | 1.00 (3.00)                                    | 1.50 (4.00)                               | 1.00 (2.00)                                   | 2.00 (2.00)                                     | 0.134                                       | Na                                                              |

|                                            |             |             |             |             |             |             |        |                                                                                                                                                                    |
|--------------------------------------------|-------------|-------------|-------------|-------------|-------------|-------------|--------|--------------------------------------------------------------------------------------------------------------------------------------------------------------------|
| 2 <sup>nd</sup> measurement/ovulation      | 2.00 (1.00) | 4.00 (3.00) | 4.00 (3.00) | 2.00 (2.00) | 1.00 (2.00) | 2.00 (2.00) | 0.028  | 0.003 <sup>12</sup> , 0.022 <sup>24</sup> ,<br>0.002 <sup>25</sup> , 0.010 <sup>26</sup>                                                                           |
| 3 <sup>rd</sup> measurement/mid-luteal     | 2.00 (1.00) | 4.00 (2.00) | 3.00 (4.00) | 1.50 (1.00) | 1.00 (2.00) | 2.00 (2.00) | <0.001 | <0.001 <sup>12</sup> , 0.012 <sup>23</sup> ,<br>0.001 <sup>24</sup> , <0.001 <sup>25</sup> ,<br>0.003 <sup>26</sup> , 0.042 <sup>34</sup> ,<br>0.019 <sup>35</sup> |
| 4 <sup>th</sup> measurement/late luteal    |             |             |             |             | 1.00 (2.00) | 2.00 (3.00) | 0.676  | Na                                                                                                                                                                 |
| <b>Overall P value</b>                     | 0.217       | 0.205       | 0.125       | 0.538       | 0.986       | 0.764       |        |                                                                                                                                                                    |
| <b>Happiness; median (IQR)</b>             |             |             |             |             |             |             |        |                                                                                                                                                                    |
| 1 <sup>st</sup> measurement/mid-follicular | 7.00 (3.00) | 7.00 (4.00) | 8.00 (3.00) | 8.00 (3.00) | 9.00 (1.00) | 8.00 (2.00) | 0.309  | Na                                                                                                                                                                 |
| 2 <sup>nd</sup> measurement/ovulation      | 8.00 (2.00) | 6.50 (3.00) | 7.00 (3.00) | 8.00 (2.00) | 9.00 (1.00) | 8.00 (2.00) | 0.002  | 0.021 <sup>12</sup> , 0.008 <sup>13</sup> ,<br>0.005 <sup>25</sup> , 0.002 <sup>26</sup> ,<br>0.003 <sup>35</sup> , 0.001 <sup>36</sup>                            |
| 3 <sup>rd</sup> measurement/mid-luteal     | 8.00 (3.00) | 7.00 (2.00) | 6.00 (3.00) | 8.50 (2.00) | 9.00 (2.00) | 9.00 (1.00) | 0.001  | 0.029 <sup>24</sup> , 0.001 <sup>25</sup> ,<br><0.001 <sup>26</sup> , 0.036 <sup>34</sup> ,<br>0.002 <sup>35</sup> , 0.001 <sup>36</sup>                           |
| 4 <sup>th</sup> measurement/late luteal    |             |             |             |             | 9.00 (2.00) | 9.00 (2.00) | 0.880  | Na                                                                                                                                                                 |
| <b>Overall P value</b>                     | 0.345       | 0.933       | 0.123       | 0.472       | 0.908       | 0.860       |        |                                                                                                                                                                    |

\*for 2mcW group the ordering of the data does not follow the actual timeline of measurement sessions (like for all other groups), but instead the phases of menstrual cycle. 1<sup>st</sup> measurement denotes mid-follicular phase, 2<sup>nd</sup> is ovulation, 3<sup>rd</sup> is mid-luteal and 4<sup>th</sup> measurement is late luteal phase.

Overall P value for between group comparisons was obtained with Kruskal-Wallis test. Post-hoc P values for between groups comparison were obtained with Mann-Whitney test:

<sup>1</sup>Men (M); <sup>2</sup>Postmenopausal women (pmW); <sup>3</sup>Oral contraceptive users (ocW); <sup>4</sup>Women with an anovulatory cycle (aoW); <sup>5</sup>Women measured during four consecutive phases of one complete menstrual cycle, starting with mid-follicular phase (1mcW); <sup>6</sup>Women measured in four phases of two different, consecutive menstrual cycles (2mcW).

Overall P value for within group comparisons was obtained with Friedman test. Post-hoc P values for within group pairwise comparison were obtained with Wilcoxon Signed Rank test: <sup>1</sup>first measurement or mid-follicular phase; <sup>2</sup>second measurement or ovulation; <sup>3</sup>third measurement or mid-luteal phase; <sup>4</sup>fourth measurement or late luteal phase. Na – not applicable.
